# Supplementary material for: Sources of pharmaceuticals and personal care products in swimming pools
Source: Oxford University Press journal article supplement (doi:10.2166/wh.2017.004), 2017-07-26
Supplement: wh2017004supp.docx [file wh2017004supp.docx]

**Supporting Information**

**Sources of pharmaceutical and personal care products in swimming pools**

Laura M. Suppes1*, Ching-Hua Huang2, Wan-Ning Lee2, Kyle J. Brockman1

1 Environmental Public Health Program, the University of Wisconsin-Eau Claire, Eau Claire, Wisconsin 54702, USA

2 School of Civil and Environmental Engineering, Georgia Institute of Technology, Atlanta, Georgia 30332, USA

*Corresponding author: Email: [suppeslm@uwec.edu](mailto:suppeslm@uwec.edu)

**ANALYTICAL METHODS**

Sampling, processing and analysis methods were adopted from Weng and colleagues (2014) and Padhye and colleagues (2014). One liter of pool water and 1 L of fill water were collected in duplicate in borosilicate amber bottles at each pool site, immediately quenched with 80 mg sodium thiosulfate to remove residual chlorine, preserved on-site with HCl to pH 2.0–2.5, transported to the University of Wisconsin-Eau Claire Environmental Public Health laboratory within 2 h of collection, refrigerated, and processed by solid phase extraction (SPE) within 48 h. One liter of each sample was passed through a 6 mL 500 mg hydrophilic-lipophilic balance (HLB) cartridge (Waters Corp., Milford, MA) at less than 20 mL/min using a vacuum SPE manifold. Cartridges were pre-conditioned with 5 mL methanol and 5 mL deionized water sequentially. After extraction of water samples, each cartridge was vacuum dried for 5 min and eluted with two applications of 4 mL methanol (8 mL total aliquot). The aliquot was reduced to 500 µL by gentle nitrogen gas blowing and reconstituted with 500 µL 50:50 (v/v) deionized water/methanol mix. The final 1 mL aliquot was transferred to an HPLC vial, stored at −10°C, and shipped on dry ice to the Georgia Institute of Technology School of Civil and Environmental Engineering for analysis within 30 days of sample collection by High-Performance Liquid Chromatography-Tandem Mass Spectrometry (HPLC-MS/MS) or High-Performance Liquid Chromatography-Mass Spectrometry (HPLC-MS). Four sets of samples were processed, shipped and analyzed in March, April, June and July of 2015. Duplicate deionized water blanks (*n* = 8) and spikes (*n* = 8) were shipped with each sample set. Duplicate spiked fill (*n* = 6) and spiked pool water samples (*n* = 8) were also shipped with each sample set. The fill water sample in April was unable to be processed, so was not analyzed for the April sample set. Deionized, fill and pool water were spiked with the 24 PPCPs at 1,000 ng/L each from a concentrated standard mix. Standards were prepared in methanol as mixtures of all of the PPCPs and stored at −10°C.

The HPLC-MS/MS analysis was conducted for the March samples by an Agilent 1260 Infinity LC system with 6410 Triple Quad MSD (Agilent Technologies, Palo Alto, CA), using a Supelco (Bellefonte, PA) Ascentis RP-Amide (10 cm × 2.1 mm, 3 μm) column at 40°C with a flow rate of 0.25 mL/min. Based on the compound’s chemical properties, the target PPCPs were analyzed using electrospray ionization (ESI) in positive or negative mode with 10 μL injection volume. The LC mobile phase was (A) 0.1% formic acid in DI water and (B) 1:1 acetonitrile:methanol (v/v) mixture for the positive mode. For the negative mode, the mobile phase was (A) 0.1% acetic acid and 0.1% ammonium acetate in deionized water and (B) 1:1 acetonitrile:methanol (v/v) mixture. The mass spectrometer was operated at fragmentation voltage 70 V, capillary voltage +/− 4500 V, gas temperature 350°C (6.0 L/min), and nebulizer pressure 40 psi. The target PPCPs were identified based on the retention time, molecular ion, and characteristic product ions. Due to instrumental problems, the April, June and July samples were analyzed by an Agilent 1100 Series HPLC-MS system. The column, HPLC and MS setting were the same as those on the HPLC-MS/MS, and selected ion monitoring (SIM) mode was applied for quantification. Before switching over to HPLC-MS, the PPCP analytical methods by HPLC-MS/MS and HPLC-MS were compared side-by-side and found to be highly comparable in compound retention time and response values in the sample matrices of this study. The method detection limits (MDLs) were estimated for each compound by using the standard deviation of seven replicate analyses multiplied by the student t-value of 3.14 (for 99% confidence level) and taking into account the concentration factor by SPE. The overall MDLs were estimated at the level of 50 ng/L for clarithromycin and erythromycin anhydrate, 10 ng/L for ibuprofen, diclofenac, acetaminophen, carbamazepine, and TCEP, and 0.5 to 5 ng/L for the rest of the target PPCPs. Due to the highly variable SPE extraction efficiency experienced in the spike samples in this study, analysis of the analytical results focused on confirmed detection of PPCPs in the samples (i.e., frequency of detection) instead of exact concentrations.

Table S1: Characteristics of PPCPs selected for this study.

| **PPCP** | **Class** | **Primary Health Effect(s)** | **References, Primary Health Effect(s)** | **Reactivity to Chlorine* (reference)** | **Probability from swimmers** |
| --- | --- | --- | --- | --- | --- |
| Acetaminophen | Analgesic/Anti-inflammatory | Liver and kidney toxicity | Fischer *et al*. 1981 | High  *k*app = 11 M-1s-1 (pH 7)  (Lee & von Gunten 2012) | High |
| Atenolol | β-Blocker | Abdominal pain, hypotension, bradycardia | Hoot *et al*. 2013 | Low  *k*app = 0.017 M-1s-1 (pH 7)  (Pinkston & Sedlak 2004) | Medium |
| Atorvastatin | Cholesterol lowering drug | Muscle pain, fatigue and weakness | Golomb & Evans 2008 | Low | High |
| Atrazine | Herbicide | Reduced testosterone levels, immune suppression, endocrine disruption | Rodriguez *et al*. 2012 | Medium | Low |
| BP3 (benzophenone 3) | Sunscreen (UV filter) | Potential reproductive effects | Coronado *et al*.2008; Fent *et al*. 2010 | High  *k*app = 1×103 M-1s-1 (pH 7)  (Duirk *et al*. 2013) | High |
| Caffeine | Stimulant | Nervousness, irritability, insomnia, tachycardia, gastrointestinal disturbances, tachypnea | Nawrot *et al*. 2003 | Low | High |
| Carbamazepine | Antiepileptic | Potential teratogenic effects (embryonic eye development); potential neurotoxicity | Ambrosio *et al*. 2000; Afshar *et al*. 2010 | Low | Low |
| Clarithromycin | Antibiotic | Nausea, vomiting, central nervous system symptoms, elevated liver enzymes | Wallace *et al*.1993 | High | Medium |
| Cotinine | Nicotine metabolite | Nausea, vomiting, headache, dizziness | Tonstad *et al*. 2014 | Low | Low |
| DEET (*N*,*N*-Diethyl-*meta*-toluamide) | Insect repellant | Coma, seizures | Petrucci & Sardini 2000 | Low | High |
| Diclofenac | Analgesic/Anti-inflammatory | Ulcers | Goswami *et al*. 2016 | Medium | High |
| Erythromycin anhydrate | Antibiotic | Potential inhibition of liver function | Smith *et al*. 2012 | High | Medium |
| Fluoxetine | Antidepressant | Potential inhibition of liver function | Smith *et al*. 2012 | High | Medium |
| Gemfibrozil | Lipid regulator | Potential inhibition of liver function | Smith *et al*. 2012 | Low  *k*app = 0.73 M-1s-1 (pH 7)  (Pinkston & Sedlak 2004) | Medium |
| Ibuprofen | Analgesic/Anti-inflammatory | Hepatotoxicity | Stempel & Miller 1977 | Low | High |
| Metoprolol | β-Blocker | Hallucinations, sleep disturbance, psychosis | Covesmith & Kirk 1985 | Low  *k*app = 0.123 M-1s-1 (pH 7)  (Acero *et al*. 2009) | Medium |
| Nonylphenol | Detergent degradate (EDC) | Hepatotoxicity | Jubendradass *et al*. 2012 | Medium  *k*app = 11 M-1s-1 (pH 7)  (Lee & von Gunten 2012) | High |
| Paroxetine | Antidepressant | Pulmonary toxicity; reproductive effects | Antonello *et al*. 2015; Gaukler *et al*. 2015 | High | Medium |
| Roxithromycin | Antibiotic | Cardiac effects | Corallo & Rogers 1996 | High | Medium |
| Sulfamethoxazole | Antibiotic | Tachypnea, metabolic acidosis | Bulathsinghala, Keefer & Van de Louw 2016 | High  *k*app = 1786 M-1s-1 (pH 7)  (Dodd & Huang 2004) | Medium |
| TCEP | Flame retardant | Potential endocrine disruption | Chen *et al*. 2015 | Low | High |
| Tonalide  (6-Acetyl-1,1,2,4,4,7-  Hexamethyltetraline or AHTN) | Sunscreen (fragrance) | Potential reproductive effects | Shi *et al*. 2013 | Low | High |
| Triclosan | Antibiotic | Possible fertility effects | Han *et al*. 2016 | High  *k*app = 300 M-1s-1 (pH 7)  (Lee & von Gunten 2012) | High |
| Trimethoprim | Antibiotic | Tachypnea, metabolic acidosis | Bulathsinghala, Keefer & Van de Louw2016 | High  *k*app = 56 M-1s-1 (pH 7)  (Dodd & Huang 2004) | High |

Note: Human toxicity studies for the selected PPCPs are limited. Primary health effects for laboratory animals and humans are reported. *Reactivity to chlorine was estimated based on the reported rate constants or the compound structure

**REFERENCES**

Acero, J. L., Benitez, F. J., Real, F. J. & Roldan, G. 2010 Kinetics of aqueous chlorination of some pharmaceuticals and their elimination from water matrices. *Water Research* **44**(14), 4158–4170. doi:10.1016/j.watres.2010.05.012

Afshar, M., Moallem, S. A., Mohammadpour, A. H., Shiravi, A., Jalalian, S. M. & Golalipour, M. J. 2010 Teratogenic effects of carbamazepine on embryonic eye development in pregnant mice. *Cutaneous and Ocular Toxicology* **29**(1), 10–15. doi:10.3109/15569520903380353

Ambrosio, A. F., Silva, A. P., Araujo, I., Malva, J. O., Soares-da-Silva, P., Carvalho, A. P. & Carvalho, C. M. 2000 Neurotoxic/neuroprotective profile of carbamazepine, oxcarbazepine and two new putative antiepileptic drugs, BIA 2-093 and BIA 2-024. *European Journal of Pharmacology* **406**(2), 191–201. doi:10.1016/s0014-2999(00)00659-2

Antonello, N., Sergio, L., Andrea, T. & Cornelius, B. 2015 Pulmonary drug toxicity: Presentation of a case of recurrent diffuse alveolar damage caused by paroxetine. *American Journal of Therapeutics* **22**(2), E43–E47. doi:10.1097/MJT.0b013e31829ed1f2

Bulathsinghala, M., Keefer, K. & Van de Louw, A. 2016 Trimethoprim/Sulfamethoxazole-induced severe lactic acidosis a case report and review of the literature. *Medicine* **95**(17), 5. doi:10.1097/md.0000000000003478

Chen, G. L., Jin, Y. X., Wu, Y., Liu, L. & Fu, Z. W. 2015 Exposure of male mice to two kinds of organophosphate flame retardants (OPFRs) induced oxidative stress and endocrine disruption. *Environmental Toxicology and Pharmacology* **40**(1), 310–318. doi:10.1016/j.etap.2015.06.021

Corallo, C. E. & Rogers, I. R. 1996 Roxithromycin-induced digoxin toxicity. *Medical Journal of Australia* **165**(8), 433–434.

Coronado, M., De Haro, H., Deng, X., Rempel, M. A., Lavado, R. & Schlenk, D. 2008 Estrogenic activity and reproductive effects of the UV-filter oxybenzone (2-hydroxy-4-methoxyphenyl-methanone) in fish. *Aquatic Toxicology* **90**(3), 182–187. doi:10.1016/j.aquatox.2008.08.018

Covesmith, J. R. & Kirk, C. A. 1985 CNS-related side-effects with metoprolol and atenolol. *European Journal of Clinical Pharmacology* **28**, 69–72. doi:10.1007/bf00543713

Dodd, M. C. & Huang, C. H. 2004 Transformation of the antibacterial agent sulfamethoxazole in reactions with chlorine: Kinetics mechanisms, and pathways. *Environmental Science & Technology* **38**(21), 5607–5615. doi:10.1021/es035225z

Duirk, S. E., Bridenstine, D. R. & Leslie, D. C. 2013 Reaction of benzophenone UV filters in the presence of aqueous chlorine: Kinetics and chloroform formation. *Water Research* **47**(2), 579–587. doi:10.1016/j.watres.2012.10.021

Fent, K., Kunz, P. Y., Zenker, A. & Rapp, M. 2010 A tentative environmental risk assessment of the UV-filters 3-(4-methylbenzylidene-camphor), 2-ethyl-hexyl-4-trimethoxycinnamate, benzophenone-3, benzophenone-4 and 3-benzylidene camphor. *Marine Environmental Research* **69**, S4–S6. doi:10.1016/j.marenvres.2009.10.010

Fischer, L. J., Green, M. D. & Harman, A. W. 1981 Levels of acetaminophen and its metabolites in mouse-tissues after a toxic dose. *Journal of Pharmacology and Experimental Therapeutics* **219**(2), 281–286.

Gaukler, S. M., Ruff, J. S., Galland, T., Kandaris, K. A., Underwood, T. K., Liu, N. M., Young, E. L., Morrison, L. C., Yost, G. S. & Potts, W. K. 2015 Low-dose paroxetine exposure causes lifetime declines in male mouse body weight, reproduction and competitive ability as measured by the novel organismal performance assay. *Neurotoxicology and Teratology* **47**, 46–53. doi:10.1016/j.ntt.2014.11.002

Golomb, B. A. & Evans, M. A. 2008 Statin adverse effects a review of the literature and evidence for a mitochondrial mechanism. *American Journal of Cardiovascular Drugs* **8**(6), 373–418.

Goswami, S. K., Wan, D. B., Yang, J., da Silva, C. A. T., Morisseau, C., Kodani, S. D., Yang, G. Y., Inceoglu, B. & Hammock, B. D 2016 Anti-ulcer efficacy of soluble epoxide hydrolase inhibitor TPPU on diclofenac-induced intestinal ulcers. *Journal of Pharmacology and Experimental Therapeutics* **357**(3), 529–536. doi:10.1124/jpet.116.232108

Han, J., Won, E. J., Hwang, U. K., Kim, I. C., Yim, J. H. & Lee, J. S. 2016 Triclosan (TCS) and triclocarban (TCC) cause lifespan reduction and reproductive impairment through oxidative stress-mediated expression of the defensome in the monogonont rotifer (Brachionus koreanus). *Comparative Biochemistry Physiology Part C: Toxicology & Pharmacology* **185**, 131–137.

Hoot, N. R., Benitez, J. G. & Palm, K. H. 2013 Hemodynamically unstable: accidental atenolol toxicity? *Journal of Emergency Medicine* **45**(3), 355–357. doi:10.1016/j.jemermed.2013.03.027

Jubendradass, R., D’Cruz, S. C., Rani, S. J. A. & Mathur, P. P. 2012 Nonylphenol induces apoptosis via mitochondria- and Fas-L-mediated pathways in the liver of adult male rat. *Regulatory Toxicology and Pharmacology* **62**(3), 405–411. doi:10.1016/j.yrtph.2012.01.004

Lee, Y. & von Gunten, U. 2012 Quantitative structure-activity relationships (QSARs) for the transformation of organic micropollutants during oxidative water treatment. *Water Research* **46**(19), 6177–6195. doi:10.1016/j.watres.2012.06.006

Nawrot, P., Jordan, S., Eastwood, J., Rotstein, J., Hugenholtz, A. & Feeley, M. 2003 Effects of caffeine on human health. *Food Additives and Contaminants Part a – Chemistry Analysis Control Exposure & Risk Assessment* **20**(1), 1–30. doi:10.1080/0265203021000007840

Padhye, L. P., Yao, H., Kung’u, F. T. & Huang, C. H. 2014 Year-long evaluation on the occurrence and fate of pharmaceuticals, personal care products, and endocrine disrupting chemicals in an urban drinking water treatment plant. *Water Research* **51**, 266–276. doi:10.1016/j.watres.2013.10.070

Petrucci, N. & Sardini, S. 2000 Severe neurotoxic reaction associated with oral ingestion of low-dose diethyltoluamide-containing insect repellent in a child. *Pediatric Emergency Care* **16**(5), 341–342. doi:10.1097/00006565-200010000-00009

Pinkston, K. E. & Sedlak, D. L. 2004 Transformation of aromatic ether-and amine-containing pharmaceuticals during chlorine disinfection. *Environmental Science & Technology* **38**(14), 4019–4025. doi:10.1021/es0353681

Rodriguez, V. M., Thiruchelvam, M. & Cory-Slechta, D. A. 2012 Sustained exposure to the widely used herbicide atrazine: altered function and loss of neurons in brain monoamine systems (Retraction of vol 113, pg 708, 2005). *Environmental Health Perspectives* **120**(8), A303–A303. doi:10.1289/ehp.7783RET

Shi, J. C., Li, M., Jiao, Z. H., Zhang, J., Feng, Y. X. & Shao, B. 2013 Microarray analysis of gene expression in mouse (strain 129) embryonic stem cells after typical synthetic musk exposure. *Bulletin of Environmental Contamination and Toxicology* **90**(1), 17–21. doi:10.1007/s00128-012-0865-7

Smith, E. M., Iftikar, F. I., Higgins, S., Irshad, A., Jandoc, R., Lee, M. & Wilson, J. Y. 2012 *In vitro* inhibition of cytochrome P450-mediated reactions by gemfibrozil, erythromycin, ciprofloxacin and fluoxetine in fish liver microsomes. *Aquatic Toxicology* **109**, 259–266. doi:10.1016/j.aquatox.2011.08.022

Stempel, D. A. & Miller, J. J. 1977 Lymphopenia and hepatic toxicity with ibuprofen. *Journal of Pediatrics* **90**(4), 657–658. doi:10.1016/s0022-3476(77)80396-x

Tonstad, S., Gustavsson, G., Kruse, E., Walmsley, J. M. & Westin, A. 2014 Symptoms of nicotine toxicity in subjects achieving high cotinine levels during nicotine replacement therapy. *Nicotine & Tobacco Research* **16**(9), 1266–1271. doi:10.1093/ntr/ntu076

Wallace, R. J., Brown, B. A. & Griffith, D. E. 1993 Drug intolerance to high-dose clarithromycin among elderly patients. *Diagnostic Microbiology and Infectious Disease* **16**(3), 215–221. doi:10.1016/0732-8893(93)90112-k

Weng, S. C., Sun, P. Z., Ben, W. W., Huang, C. H., Lee, L. T. & Blatchley, E. R. 2014 The presence of pharmaceuticals and personal care products in swimming pools. *Environmental Science & Technology Letters* **1**(12), 495–498. doi:10.1021/ez5003133
